# Supplementary material
Source: PubMed Central journal article supplement (PMC3650345)

Supplemental Material for:

**The metabolic regulation of sporulation and parasporal crystal  
formation in *Bacillus thuringiensis* revealed by transcriptomics and  
proteomics**

Jieping Wang, Han Mei, Cao Zheng, Hongliang Qian, Cui Cui, Yang Fu, Jianmei Su,

Ziduo Liu, Ziniu Yu and Jin He\*

State Key Laboratory of Agricultural Microbiology, College of Life Science and  
Technology, Huazhong Agricultural University, Wuhan, Hubei 430070, P. R. China

\*To whom all correspondence should be addressed: [hejin@mail.hzau.edu.cn](mailto:hejin@mail.hzau.edu.cn), +86 27

87280670

## Figure legends

### **Supplemental Fig. S1 The correlation between changes in mRNA and protein abundance**

The quantified proteins in each temporal comparison are clustered into seven groups based on the pattern of changes in mRNA and protein levels: Group I, the mRNA and protein levels have the same change trends; Group II, mRNA is up-regulated but protein is down-regulated; Group III, mRNA is up-regulated but protein is not significantly changed; Group IV, mRNA remains almost unchanged while protein is up-regulated; Group V, mRNA remains almost unchanged but protein is down-regulated; Group VI, mRNA is down-regulated but protein is not significantly changed; and Group VII, mRNA is down-regulated but protein is up-regulated. Group I contains three subgroups: both mRNA and protein are up-regulated synchronously (red color); both mRNA and protein are down-regulated synchronously (green color); and both mRNA and protein remain unchanged

### **Supplemental Fig. S2 The cannibalism phenomenon in CT-43**

Sporulating and nonsporulating cells were obviously discriminated under a phase contrast microscope. Scale bars represent 10 micrometers.

### **Supplemental Fig. S3 The carbohydrate metabolism network and metabolic regulation of CT-43**

The metabolic pathways and related genes are obtained mainly according to the annotated information of the *B. thuringiensis* strain BMB171 in the KEGG database ([http://www.kegg.jp/kegg-bin/search\\_pathway\\_text?map=btb&keyword=&mode=1&viewImage=true](http://www.kegg.jp/kegg-bin/search_pathway_text?map=btb&keyword=&mode=1&viewImage=true)). The colors of the marked genes are: red, up-regulated at 13 h compared to 7 h; purple, specifically induced at 13 h; blue, remaining almost unchanged at each phase; green, down-regulated at 13 h compared to 7 h at the transcriptional level.

# Figure S1

7 h vs. 9 h

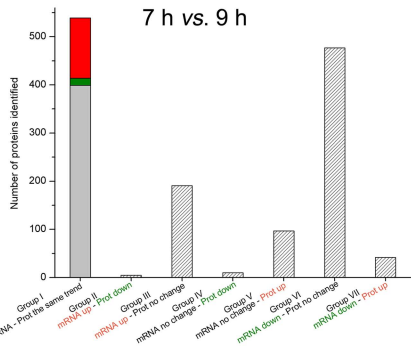

7 h vs. 13 h

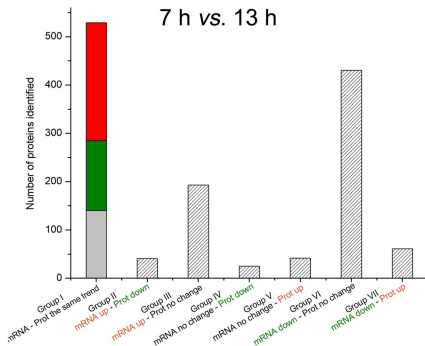

7 h vs. 22 h

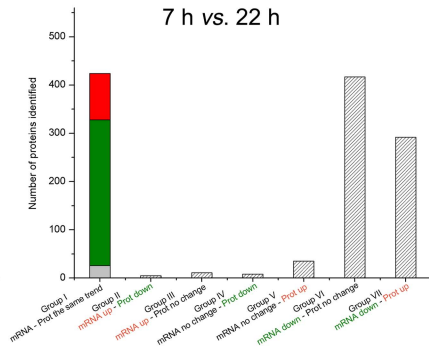

9 h vs. 13 h

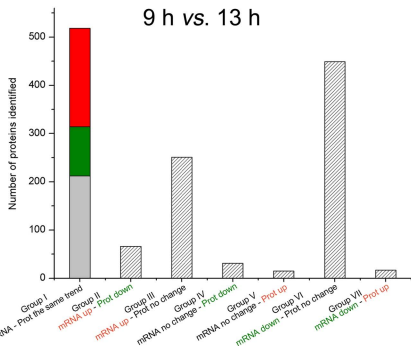

9 h vs. 22 h

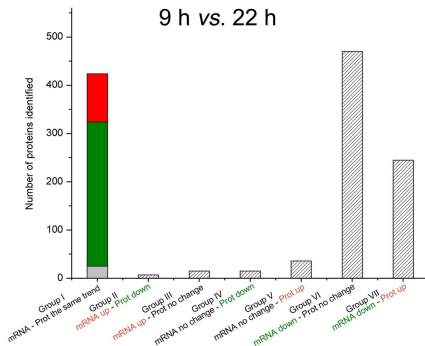

13 h vs. 22 h

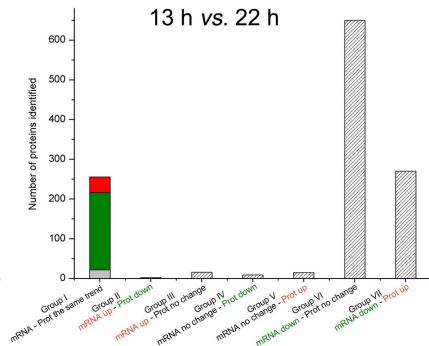

Figure S2

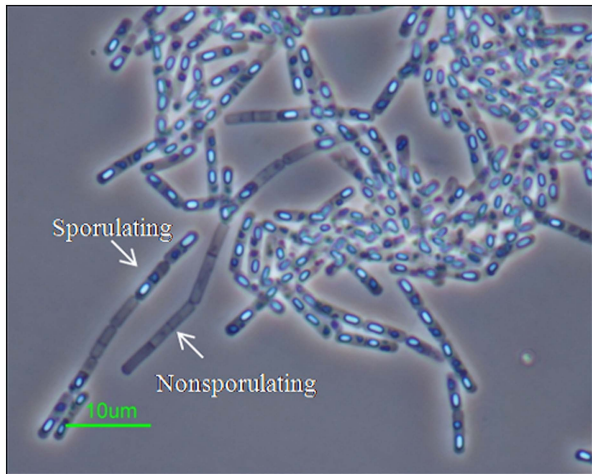

Figure S3

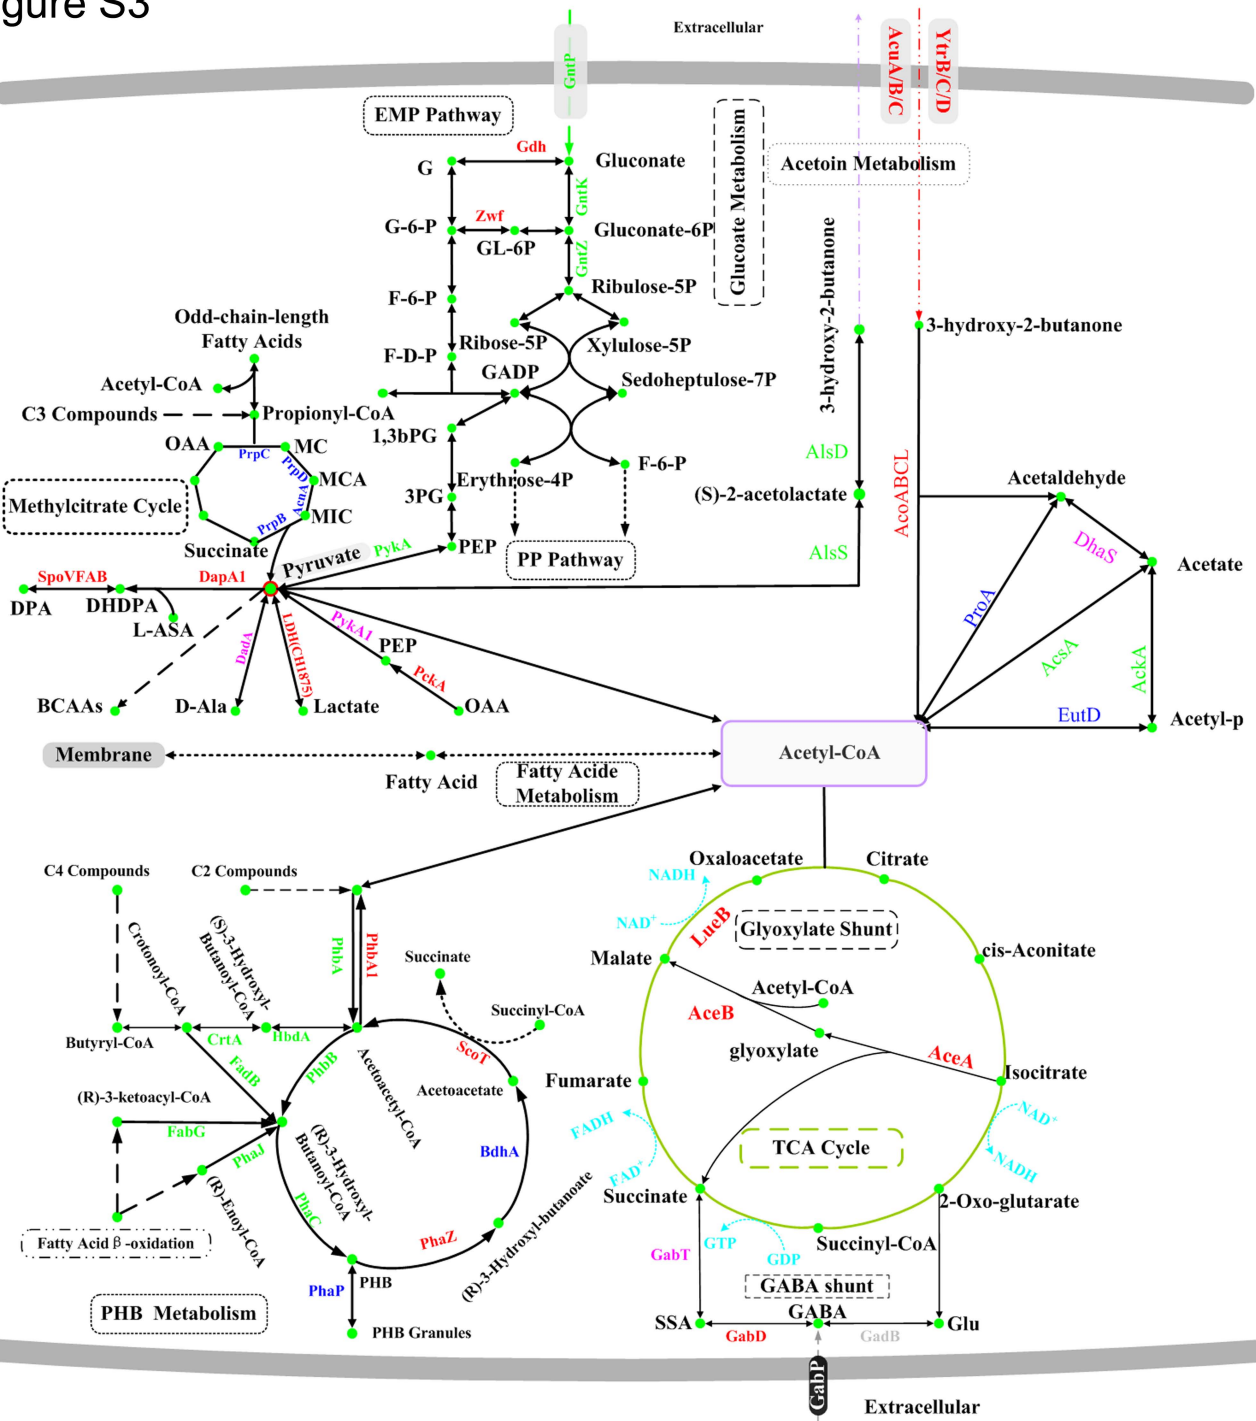

Supplement: supp_M112.023986_mcp.M112.023986-1.pdf [file supp_M112.023986_mcp.M112.023986-1.pdf]
